# Supplementary material for: Chronic ankle instability modifies proximal lower extremity biomechanics during sports maneuvers that may increase the risk of ACL injury: A systematic review
Source: Front Physiol. 2022 Oct 18;13:1036267. doi: 10.3389/fphys.2022.1036267 (PMC9623000; doi:10.3389/fphys.2022.1036267)
Supplement: Supplementary file 1 [file Table2.XLS]

## Sheet: SUPPLEMENTARY TABLE 2
SUPPLEMENTARY TABLE 2 Summary of articles related to landing
Authors	Task	Platform height(cm)	Distance from platform to the center of the force plate	Landing surfaces condition	Foot condition	Planes	Time Frame	Variables	Hip	Knee	Ankle
Caulfield et al.,2002	Single leg jump landing	40	/	Flat	Barefoot	S	(-)100ms to (+)200ms	Knee and ankle joints angles and movements	/	↑FL((-)20ms to (+)60ms)	↑DF((-)10ms to (+)20ms)
Delahunt et al.,2006	Single leg jump landing	35	/	Flat	/	F+S+T	(-)200ms to (+)200ms	Lower extremity joints angles and movements	↓EXT ROT((-)200ms to (-)55ms)	NA	↑INV((-)200ms to (-)90ms)
											↓DF((+)90ms to (+)200ms)
Gribble et al.,2009	Double-leg take-off jump with a single-limb landing	/	70cm	Flat	/	S	IC	Lower extremity joints angles	NA	↓FL	NA
Gribble et al.,2010	Double-leg take-off jump with a single-limb landing	/	70cm	Flat	Shod	S	(-)100m, IC	Lower extremity joints angles	NA	↓FL((-)100ms）	NA
Kipp et al.,2012	Double-leg take-off jump with a single-limb landing	15	Leg length	Flat	/	F+S	(-)100ms to (+)200ms	Ankle joint angles and movements	/	/	NA
Zhang et al.,2012	Double-leg take-off jump with a single-limb landing	60	/	Flat	Shod	F+S	IC to (+)350ms	Ankle joint angles	/	/	NA
Kipp et al.,2013	Double-leg take-off jump with a single-limb landing and 90°cut	15	Leg length	Flat	/	F+S+T	(-)100ms to (+)200ms	Ankle joint angles	/	/	NA
Gehring et al.,2014	Double-leg drop–vertical-jump	/	/	A deflexion of 24° INV and 15°PF	Barefoot	F+S+T	(-)200ms to (+)300ms	Ankle joint angles	/	/	↑peak INV
De Ridder et al.,2015	Double-leg take-off jump with a single-limb landing	30	40% of height	Flat	Barefoot	F+S+T	(-)200ms to (+)200ms	Lower extremity joints angles	NA	NA	NA
Wright et al.,2016	Single leg jump landing	40	/	Flat	/	F+S	IC, maximum vertical GRF	Ankle joint angles	/	/	Rearfoot↑DF at IC
Son et al.,2017	Double-leg take-off jump with a single-limb landing and 90°cut	/	50% of height	Flat	/	F+S	IC to TO	Lower extremity joints angles and movements	↑FL(3-100%SP)	↑FL(5-36%, 72-88%SP)	↓PF(0-24%, 83-100%SP)↓DF(34-69%SP)
									↓ABD(10-20%SP)	↑ABD(0-7%, 18-42%,84-97%SP)	↓INV(6-38%SP)
									↓EXM(0-8%, 23-27%SP)↑EXM(8-18%,32-100%SP)	↑EXM(1-22%SP)↓EXM(26-74%SP)	↑PFM(0-12%SP)↓PFM(16-82%SP)
									↑ABDM(4-16%SP)↓ABDM(38-48%SP)	↑ABDM(3-9%,53-90%SP)↓ABDM(31-37%SP)	↑EVM(0-7%, 89-97%SP)
Herb et al.,2018	Double-leg drop–vertical-jump	30	/	Flat	/	F+S	(-)100ms to (+)200ms	Lower extremity joints angles and movement	NA	↓FL((+)95ms to (+)200ms)	↓PF((+)11ms to (+)71ms)
											↑INV((+)107ms to (+)200ms)
											↑PFM((+)11ms to (+)77ms,(+)107ms to (+)200ms)
Kim et al.,2018	Double-leg take-off jump with a single-limb landing and 90°cut	/	50% of height	Flat	Shod	F+S	IC to TO	Lower extremity joints movements	↑EXM(8-20%, 27-32%, 33-86%SP)	↓EXM(21-50%, 51-63%SP)	↑PLM(5-8%, 84-95%SP)↓PLM(16-50%, 51-75%SP)
Li et al.,2018	Single leg landing	30	/	Inverted	Shod	F+S+T	IC to the center of mass reached its lowest height	Knee and ankle joints angles and movements	/	↑FL (at IC)	↑INV (at IC)
										↑peak FL, ↑peak EXM, ↑peak INT ROTM	↓peak EVM
Kunugi et al.,2018	Double-leg take-off jump 45 °anterolateral with a single-limb landing and vertical-jump	30	/	Flat	Barefoot	F+S+T	(-)300ms to (+)300ms	Lower extremity joints angles	↓ADD((+)70ms to (+)120ms)	↓FL((+)120ms to (+)190ms)	↓DF((-)10ms to (+)300ms)
										↓EXT ROT((-)300ms to (-)250ms)
McCann et al.,2019	Double-leg take-off jump with a single-limb landing	70	2 feet	Flat	/	F+S+T	(-)200ms to (+)50ms	Lower extremity joints angles	↓ABD((-)78ms to (+)34ms)	NA	NA
Kim et al.,2019	Double-leg take-off jump with a single-limb landing and 90°cut	/	50% of height	Flat	Shod	F+S	IC to TO	Lower extremity joints angles	↑FL(0-83%SP)	↑FL(12-90%SP)	↓DF(15-70%SP)
									↑ABD(10-65%SP)		↑INV(0-13%, 80-100%SP)
Hopkins et al.,2019	Double-leg take-off jump with a single-limb landing and 90°cut	/	50% of height	Flat	Shod	F+S	IC to TO	Lower extremity joints angles and movements	↑FL(0-9%, 17-87%SP)	↓FL(30-57%SP)	↑PF(0-10%SP)↓DF(27-65%SP)
									↑ABD(0-24%, 31-43%, 58-100%)	↑ABD(6-88%SP)	↑EV(0-6%SP)↑INV(7-73%SP) ↓INV(79-96%SP)
									↑FLM(5-15%SP)↑EXM(38-82%SP)	↓EXM(0-70%SP)	↓PFM(0-69%SP)↑PFM(76-94%SP)
									↓ABDM(0-44%,80-100%SP)	↑ABDM	↑INVM
Lin et al.,2019	Single leg jump landing	/	Leg length	Flat	Barefoot	F+S	(-)100ms to the maximum knee flexion angle	Lower extremity joints angles and movements	↑FL(IC to the maximum knee flexion angle)	NA	↓INV(IC to the maximum knee flexion angle)
									↑ABD(IC to the maximum knee flexion angle)		↑peak EVM
Simpson et al.,2019	Single leg landing	30	/	20° INV	Shod	S	(-)200ms to (+)200ms	Ankle joint angles	/	/	↑peak INV
Moisan et al.,2020	Single leg jump landing	46	/	Flat, unstable, 25°INV	Shod	F+S+T	IC to the maximum knee flexion angle	Lower extremity joints angles and movements	NA	↑EXM(25° INV platform）	↑DF(unstable)
Jeon et al.,2020	Double-leg take-off jump with a single-limb landing	30	/	Flat	/	F+T	IC to the maximum vertical GRF	Lower extremity joints anglesand movements	↑FL	↑FL	NA
Watabe et al.,2021	Single leg landing	30	/	Flat, 5° INV	Barefoot	S	IC	Ankle joint angles	/	/	↑max INV (5°INV platform)
Watanabe et al.,2022	Single leg landing	30, 40, 50	/	Flat	/	F+S+T	IC to (+)200ms	Lower extremity joints angles and movements	NA	↑peak FL (50cm)	↑peak DF
											↑peak PFM (50cm)
(-): before IC, (+): after IC, “/”: not measured in the study
ABD: abduction, ABDM: abduction movement, ADD: adduction, COP:center of pressure, DF: dorsiflexion, DFM: dorsiflexion movement,EV: eversion, EXM: extension moment, EVM: eversion moment, EXT ROT: external rotation, F: frontal, FL: flexion, GRF: ground reaction force, IC: initial contact, INV: inversion, INT ROT: internal rotation, INT ROTM: internal rotation movement, NS: no significant difference…
